# Supplementary material for: Simulation of charge-transfer, UV-VIS and resonance Raman spectra of push–pull systems: a TDDFT and CASPT2 comparison
Source: Royal Society of Chemistry journal article supplement (doi:10.1039/d2cp04401c), 2022-01-01
Supplement: d2cp04401c1.pdf [file d2cp04401c1.pdf]

# Simulation of Charge-Transfer, UV-VIS and Resonance Raman Spectra of Push-Pull Systems: a TDDFT and CASPT2 Comparison

Adalberto V. S. de Araújo,\* Leandro R. Marques, Antonio C. Borin, Rômulo A. Ando\*

## Supporting Information

### 1. Dimensionless normal coordinates

**Table S1.** Main dimensionless normal coordinate displacements of pNA and [pNA]<sup>-</sup> calculated from the multiconfiguration approach, and from the cartesian gradient of the TDDFT calculations.

| pNA         |                              |            |            | [pNA] <sup>-</sup> |                              |            |            |
|-------------|------------------------------|------------|------------|--------------------|------------------------------|------------|------------|
| Normal Mode | $\omega$ (cm <sup>-1</sup> ) | TDDFT      | XMS-CASPT2 | Normal Mode        | $\omega$ (cm <sup>-1</sup> ) | TDDFT      | XMS-CASPT2 |
|             |                              | $\Delta_i$ | $\Delta_i$ |                    |                              | $\Delta_i$ | $\Delta_i$ |
| 17          | 822                          | 0.333336   | 0.555542   | 15                 | 802                          | 0.098587   | -0.875610  |
| 19          | 867                          | 0.620528   | -1.008829  | 18                 | 830                          | -0.000073  | 0.011196   |
| 24          | 1127                         | 0.416465   | -0.319512  | 23                 | 1132                         | -0.268702  | 1.086047   |
| 26          | 1197                         | -0.471066  | 0.314336   |                    |                              |            |            |
| 27          | 1296                         | 0.781484   | 1.539596   | 27                 | 1307                         | 0.223491   | -0.781489  |
| 36          | 1639                         | -0.282270  | 0.338579   | 34                 | 1639                         | -0.168425  | 0.853782   |

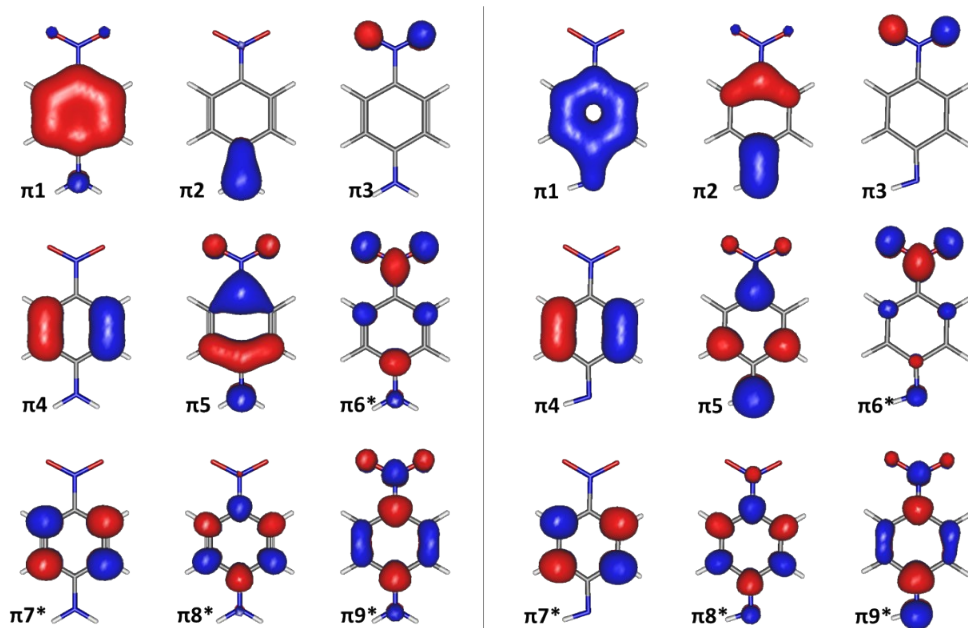

**Figure S1.** *pNA* (left) and *[pNA]<sup>-</sup>* (right) active spaces in terms of averaged valence natural orbitals, containing 10 electrons distributed between 9  $\pi/\pi^*$  obtained at the SA(5)-CASSCF(10,9)/aug-cc-pVDZ level of theory, at the optimized ground states geometries.

### 3. XYZ coordinates of optimized geometries of pNA and *[pNA]<sup>-</sup>*

#### B3LYP-D3/aug-cc-pVDZ

##### pNA

|   |           |           |           |
|---|-----------|-----------|-----------|
| C | 0.828746  | 1.652721  | -0.094350 |
| C | 1.599108  | 0.457989  | -0.065503 |
| C | 0.979832  | -0.775790 | -0.019073 |
| C | -0.425666 | -0.851642 | 0.001680  |
| C | -1.206603 | 0.319475  | -0.024025 |
| C | -0.589300 | 1.554211  | -0.070633 |
| N | -1.065731 | -2.130224 | 0.048307  |
| O | -0.363151 | -3.156764 | 0.068006  |
| O | -2.308629 | -2.182773 | 0.067992  |
| N | 1.433739  | 2.863678  | -0.140176 |
| H | 2.686739  | 0.525578  | -0.082780 |
| H | 1.570584  | -1.688157 | 0.001655  |
| H | -2.291080 | 0.245891  | -0.007233 |
| H | -1.186729 | 2.465514  | -0.091564 |
| H | 2.439771  | 2.944320  | -0.173307 |
| H | 0.891816  | 3.714612  | -0.178923 |

pNA - anion

|   |           |           |           |
|---|-----------|-----------|-----------|
| C | 0.866666  | 1.735533  | -0.000011 |
| C | 1.621548  | 0.489649  | -0.000012 |
| C | 1.008122  | -0.734440 | -0.000005 |
| C | -0.414257 | -0.829895 | -0.000003 |
| C | -1.191110 | 0.366817  | 0.000000  |
| C | -0.580801 | 1.591590  | -0.000006 |
| N | -1.034426 | -2.071617 | 0.000008  |
| O | -0.336235 | -3.128609 | 0.000002  |
| O | -2.298870 | -2.147815 | 0.000010  |
| N | 1.406759  | 2.940048  | -0.000016 |
| H | 2.711630  | 0.552102  | -0.000020 |
| H | 1.597809  | -1.648803 | -0.000010 |
| H | -2.276204 | 0.290264  | -0.000001 |
| H | -1.179489 | 2.503528  | -0.000011 |
| H | 2.426961  | 2.851498  | -0.000020 |

**XMS-CASPT2/aug-cc-pVDZ.**

pNA-S0

|   |             |             |             |
|---|-------------|-------------|-------------|
| C | 0.83878377  | 1.68292983  | 0.00000970  |
| C | 1.60914815  | 0.48971438  | 0.00004635  |
| C | 0.98733788  | -0.76089899 | 0.00005349  |
| C | -0.41570441 | -0.83406308 | 0.00007729  |
| C | -1.20198217 | 0.33025771  | 0.00004944  |
| C | -0.57775914 | 1.57965851  | 0.00004774  |
| N | -1.06851335 | -2.14396577 | -0.00006920 |
| O | -0.33963441 | -3.14973397 | -0.00011337 |
| O | -2.31039280 | -2.16764229 | -0.00009617 |
| N | 1.44968276  | 2.90870802  | -0.00009366 |
| H | 2.70233526  | 0.55363985  | 0.00001538  |
| H | 1.57036010  | -1.68354826 | 0.00008586  |
| H | -2.28969874 | 0.24039284  | 0.00008246  |
| H | -1.18494070 | 2.49095670  | 0.00000993  |
| H | 2.45675704  | 2.98518695  | -0.00014188 |
| H | 0.90426074  | 3.75873759  | -0.00012335 |

pNA-S1

|   |             |             |             |
|---|-------------|-------------|-------------|
| C | 0.83301173  | 1.67138711  | 0.00001552  |
| C | 1.62729810  | 0.47441356  | -0.00000088 |
| C | 1.01196069  | -0.77312896 | 0.00001756  |
| C | -0.42128417 | -0.84517649 | 0.00003225  |
| C | -1.22665506 | 0.34258753  | 0.00001697  |
| C | -0.60093582 | 1.58497378  | 0.00000226  |
| N | -1.04707204 | -2.10101331 | -0.00002753 |
| O | -0.27259076 | -3.13856800 | -0.00003537 |
| O | -2.34176619 | -2.10750935 | -0.00003539 |

|   |             |             |             |
|---|-------------|-------------|-------------|
| N | 1.43905719  | 2.88744399  | -0.00004594 |
| H | 2.71977435  | 0.56153394  | -0.00003172 |
| H | 1.56300044  | -1.71401134 | 0.00004753  |
| H | -2.30966873 | 0.21605772  | 0.00004836  |
| H | -1.18896062 | 2.50981690  | -0.00003064 |
| H | 2.45206153  | 2.96724628  | -0.00006941 |
| H | 0.89280935  | 3.74427665  | -0.00006358 |

pNA anion-S0

|   |             |             |             |
|---|-------------|-------------|-------------|
| C | 0.88131769  | 1.76375249  | -0.00001236 |
| C | 1.62694339  | 0.50284159  | -0.00001277 |
| C | 1.00425707  | -0.73580871 | -0.00000757 |
| C | -0.41109856 | -0.82447466 | 0.00000669  |
| C | -1.19077468 | 0.36567231  | -0.00000264 |
| C | -0.57297725 | 1.60389565  | -0.00000794 |
| N | -1.05640200 | -2.12016095 | -0.00000617 |
| O | -0.34224633 | -3.15017135 | 0.00001145  |
| O | -2.30862471 | -2.16783456 | 0.00001682  |
| N | 1.40471572  | 2.98212646  | -0.00001657 |
| H | 2.72538079  | 0.55672265  | -0.00001843 |
| H | 1.58116712  | -1.66541160 | -0.00001132 |
| H | -2.28061208 | 0.27020549  | -0.00000264 |
| H | -1.16586551 | 2.52652034  | -0.00001048 |
| H | 2.43292346  | 2.85197420  | -0.00002006 |

pNA anion-S1

|   |             |             |             |
|---|-------------|-------------|-------------|
| C | 0.88628523  | 1.72810511  | -0.00001086 |
| C | 1.64910998  | 0.51706692  | -0.00001037 |
| C | 1.01034984  | -0.76579681 | -0.00000105 |
| C | -0.40140669 | -0.82090495 | -0.00001212 |
| C | -1.18246522 | 0.35133200  | -0.00001073 |
| C | -0.55035625 | 1.59858801  | -0.00000542 |
| N | -1.08314576 | -2.11337521 | -0.00002555 |
| O | -0.32614913 | -3.15077407 | -0.00000247 |
| O | -2.36559325 | -2.13822805 | 0.00004950  |
| N | 1.37337635  | 3.00249439  | -0.00001648 |
| H | 2.74601851  | 0.58235801  | -0.00002260 |
| H | 1.56040155  | -1.70834092 | 0.00001058  |
| H | -2.26888425 | 0.23556855  | -0.00001049 |
| H | -1.12680034 | 2.53004139  | -0.00000277 |
| H | 2.40736353  | 2.91171496  | -0.00002317 |
